# Supplementary material
Source: publisher figshare collection journal article supplement (https://acs.figshare.com/ndownloader/files/5116273)

## **Supporting Information – Part 3 of 3**

### **A Highly Efficient Route to *o*-Allylbiaryls via Palladium-Catalyzed Three-Component Coupling of Benzynes, Allylic halides, and Aryl Organometallic reagents**

Thiruvellore Thatai Jayanth, Masilamani Jeganmohan, Chien-Hong Cheng\*

Department of Chemistry, National Tsing Hua University, Hsinchu, 30013 Taiwan

#### **Table of Contents:**

##### **Part 1**

Experimental Section and  $^1\text{H}$  and  $^{13}\text{C}$  NMR Data

##### **Part 2**

$^1\text{H}$  and  $^{13}\text{C}$  NMR Spectra for compounds 4a-c, 4e-h,  $^1\text{H}$  NMR Spectra for 4i,j

##### **Part 3**

$^1\text{H}$  and  $^{13}\text{C}$  NMR Spectra for compounds 4k-s

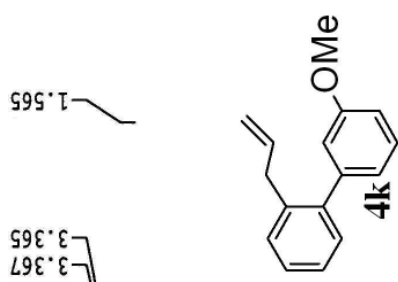

1.565

7.338  
7.332  
7.325  
7.318  
7.312  
7.279  
7.276  
7.271  
7.269  
6.933  
6.931  
6.922  
6.919  
6.905  
6.897  
6.894  
6.890  
5.954  
5.937  
5.926  
5.909  
5.055  
5.053  
5.039  
5.036  
4.972  
4.969  
4.944  
4.941  
3.844  
3.842  
3.833  
3.380  
3.378  
3.375  
3.369  
3.367  
3.365

ppm

Current Data Parameters  
NAME Jayanth-040928  
EXPNO 1  
PROCNO 1

F2 - Acquisition Parameters  
Date\_ 20040927  
Time 14.42  
INSTRUM spect  
PROBHD 5 mm QNP 1H/1  
PULPROG zg  
TD 16384  
SOLVENT CDCl3  
NS 16  
DS 0  
SWH 7183.908 Hz  
FIDRES 0.438471 Hz  
AQ 1.1403764 sec  
RG 8  
DM 69.600 usec  
DE 6.50 usec  
TE 0.0 K  
D1 2.00000000 sec  
MCREST 0.00000000 sec  
MCWRR 0.01500000 sec

===== CHANNEL f1 =====  
NUC1 1H  
P1 10.00 usec  
PL1 4.00 dB  
SFO1 599.7023988 MHz

F2 - Processing parameters  
SI 16384  
SF 599.7000261 MHz  
WDW no  
SSB 0  
LB 0.00 Hz  
GB 0  
PC 0.50

1D NMR plot parameters  
CX 23.96 cm  
CY 13.00 cm  
F1P 9.500 ppm  
F1 5697.15 Hz  
F2P -0.500 ppm  
F2 -299.85 Hz  
PPMCM 0.41739 ppm/cm  
HZCM 250.30951 Hz/cm

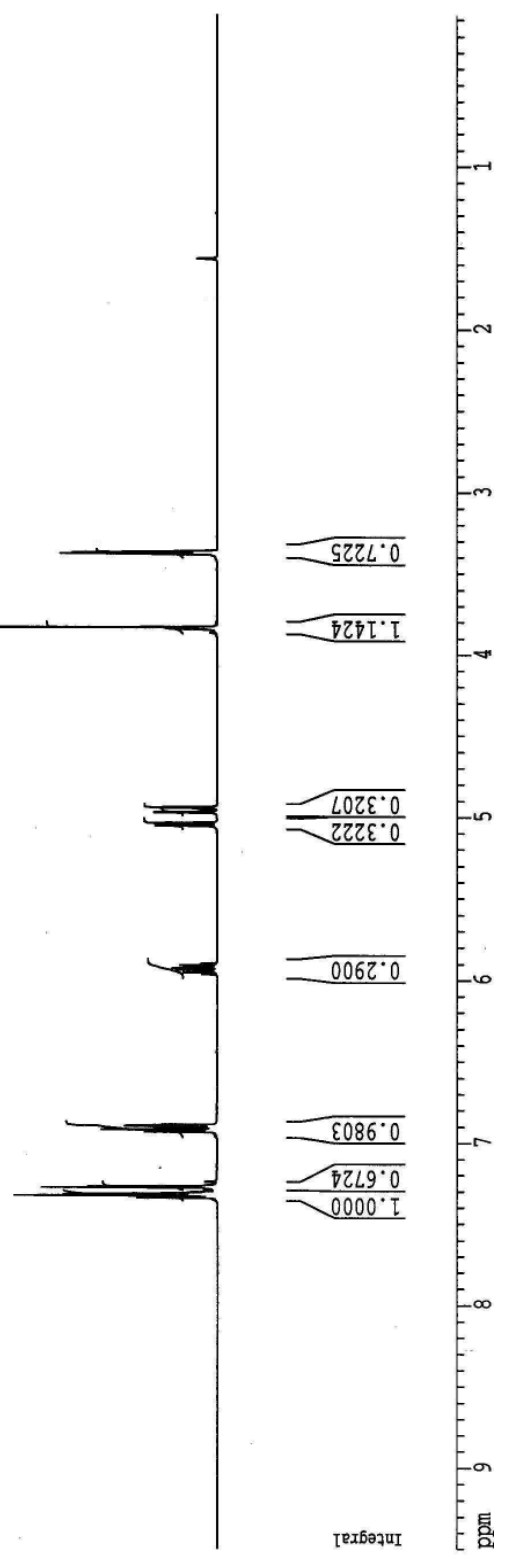

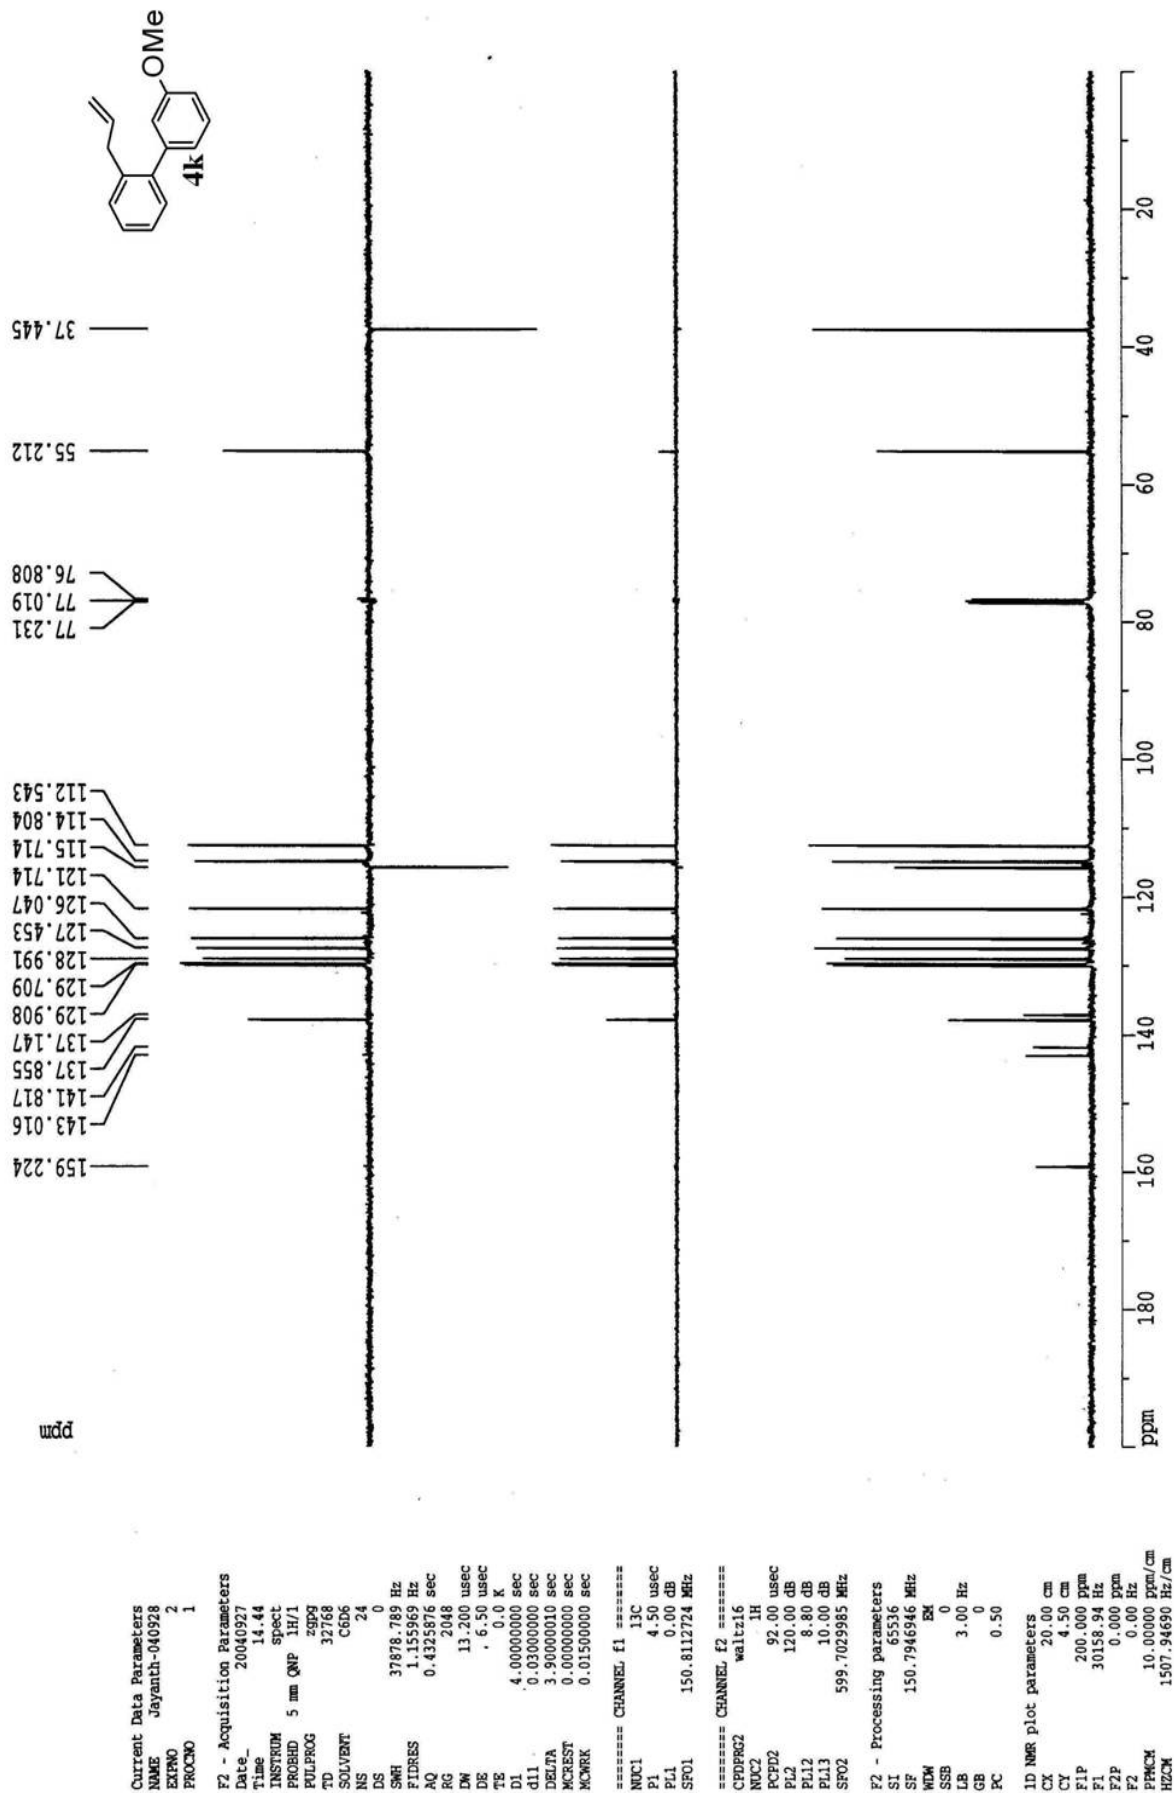

4.894  
4.893  
4.892  
4.905  
4.932  
4.936  
4.940  
5.024  
5.038  
5.042  
5.045  
5.055  
5.066  
5.076  
5.080  
5.089  
5.902  
5.910  
5.915  
5.922  
5.935  
7.072  
7.079  
7.082  
7.092  
7.095  
7.099  
7.109  
7.113  
7.119  
7.128  
7.219  
7.235  
7.240  
7.257  
7.261  
7.270  
7.274

3.338  
3.325

1.537

```

J2-5
exp1 s2pul1
date Oct 1 2004
solvent CDC13
file /export/home/~dpwr
opera/vnmrsvs/data/~
1/GANE/gane1001.00~
2H.fid
ACQUISITION
sfreq 499.839
tn 1.0
at 2.152
np 39276
sw 9000.9
fb not used
bs 4
tpwr 55
pw 1.000
d1 980.4
nt 32
ct 32
alock not used
gain not used
FLAGS
f1 n
in n
dp y
hs nn
DISPLAY
sp -0.1
wp 4997.3
vs 83
sc 0
wc 250
hzmm 7.85
ls 140.28
rfl 4656.2
rff 3618.8
th 4
ins 100.000
nm ph
DEC. & VT
dfrq 499.838
dn H1
dpwr 38
dof 0
nmn nnn
c 11299
dms 1.0
dres n
homo PROCESSING
wtfile
proc ft
fn 32768
math f
werr 5.5
wexp 1.000
wbs 32
wnt 32
wft wft
wft wft

```

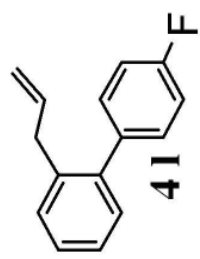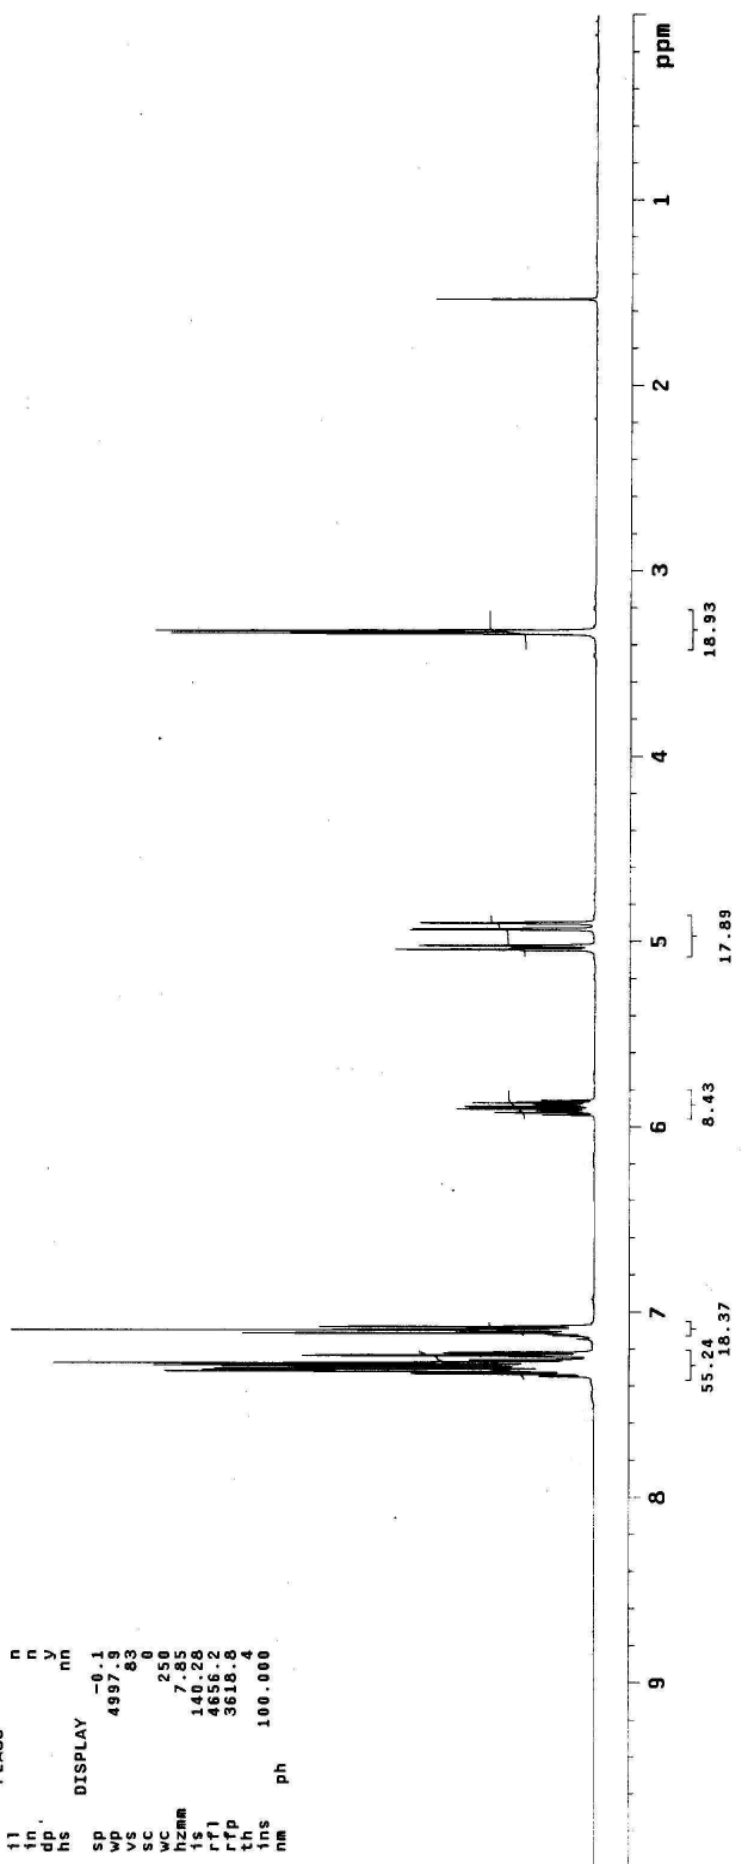

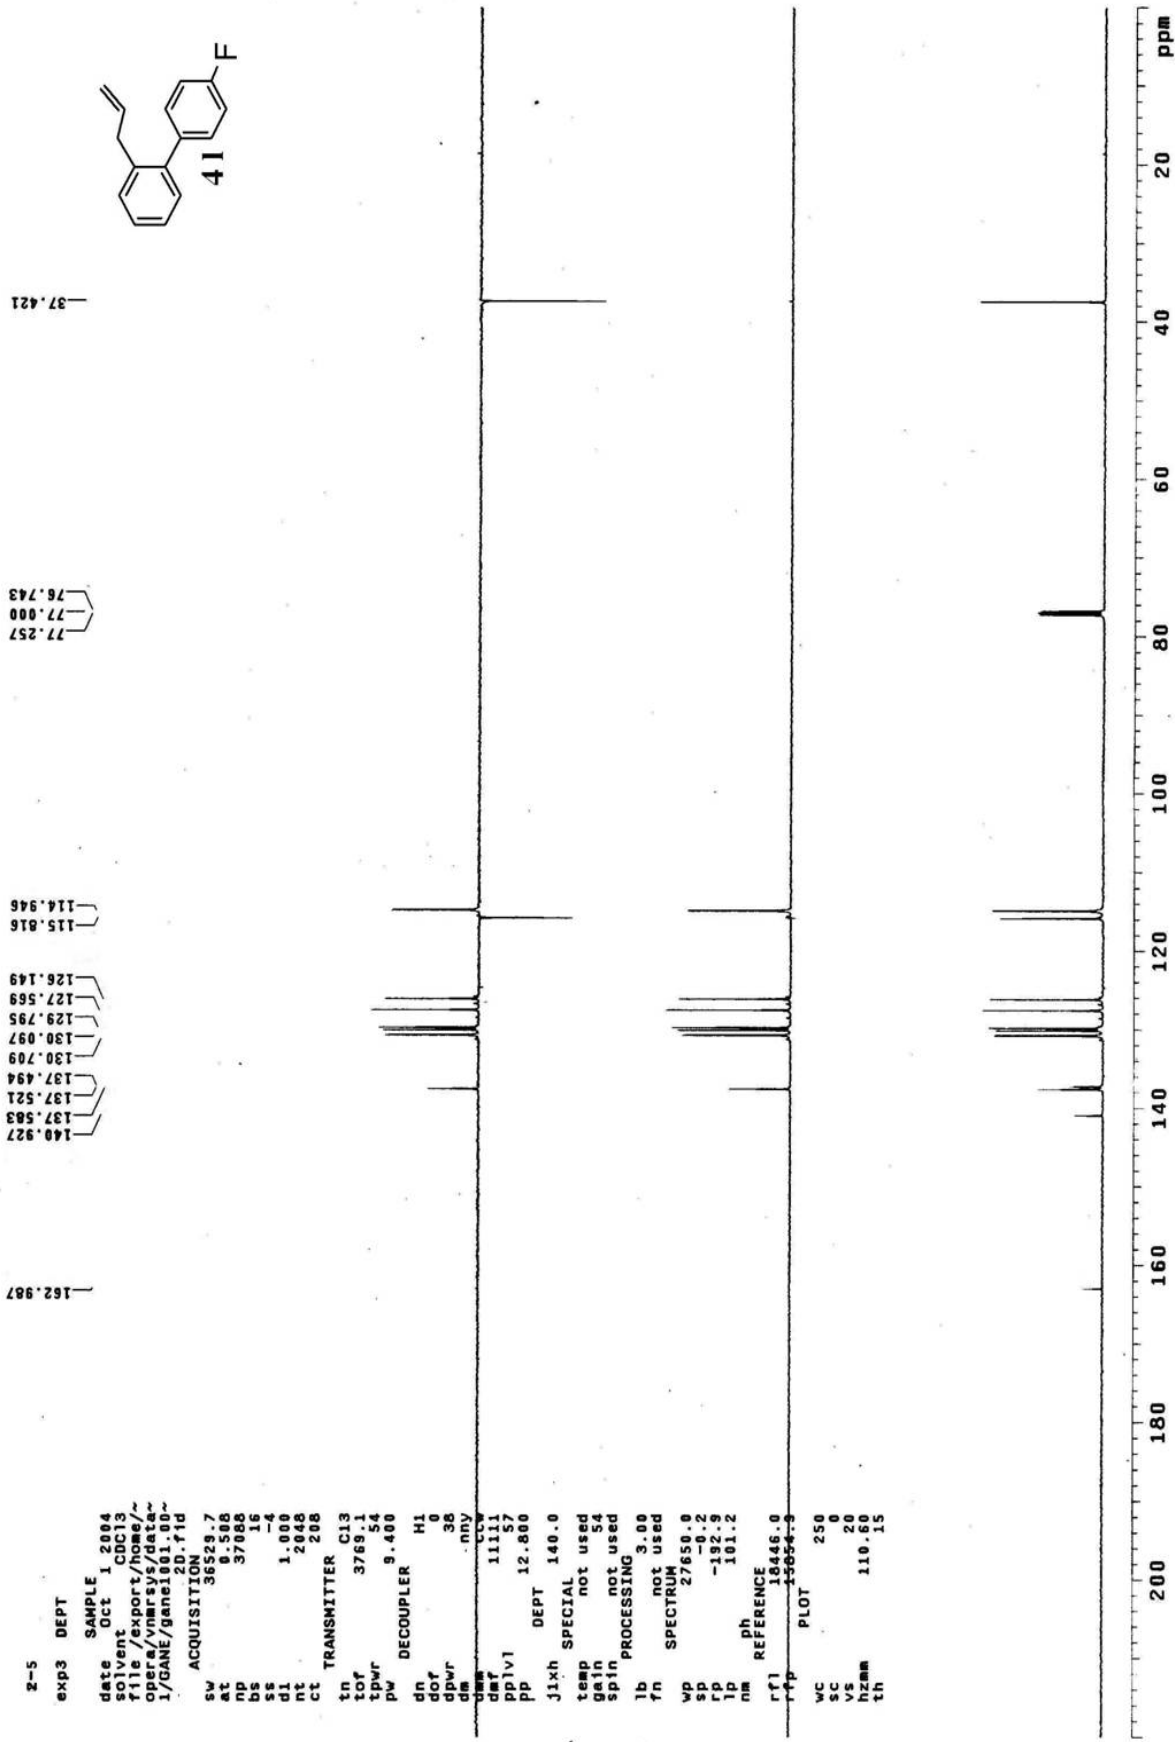

2-5 exp3 DEPT

SAMPLE date Oct 1 2004  
 solvent CDCl3  
 file /export/home/~  
 opera/vnmrsw/data/~  
 1/GANE/gane1901.00~  
 20.fid

ACQUISITION  
 sw 36523.7  
 at 9.588  
 np 37966  
 ss 14  
 si 4  
 d1 1.000  
 nt 2048  
 ct 208

TRANSMITTER  
 tn C13  
 tof 3769.1  
 tpwr 54  
 pw 9.400

DECOUPLER  
 dn H1  
 dof 0  
 dpwr 38  
 dm nny

DEPT  
 pp 12.800

11xh SPECIAL 140.0  
 temp not used  
 gain 54  
 spin not used  
 PROCESSING  
 lb 3.00  
 fn not used

SPECTRUM  
 wp 27650.0  
 sp 3.2  
 lp -12.2  
 lb 101.2

nm dh  
 REFERENCE  
 r1 18445.0  
 r2 12054.9

PLOT  
 wc 250  
 sc 0  
 vs 20  
 hzmm 110.60  
 th 15

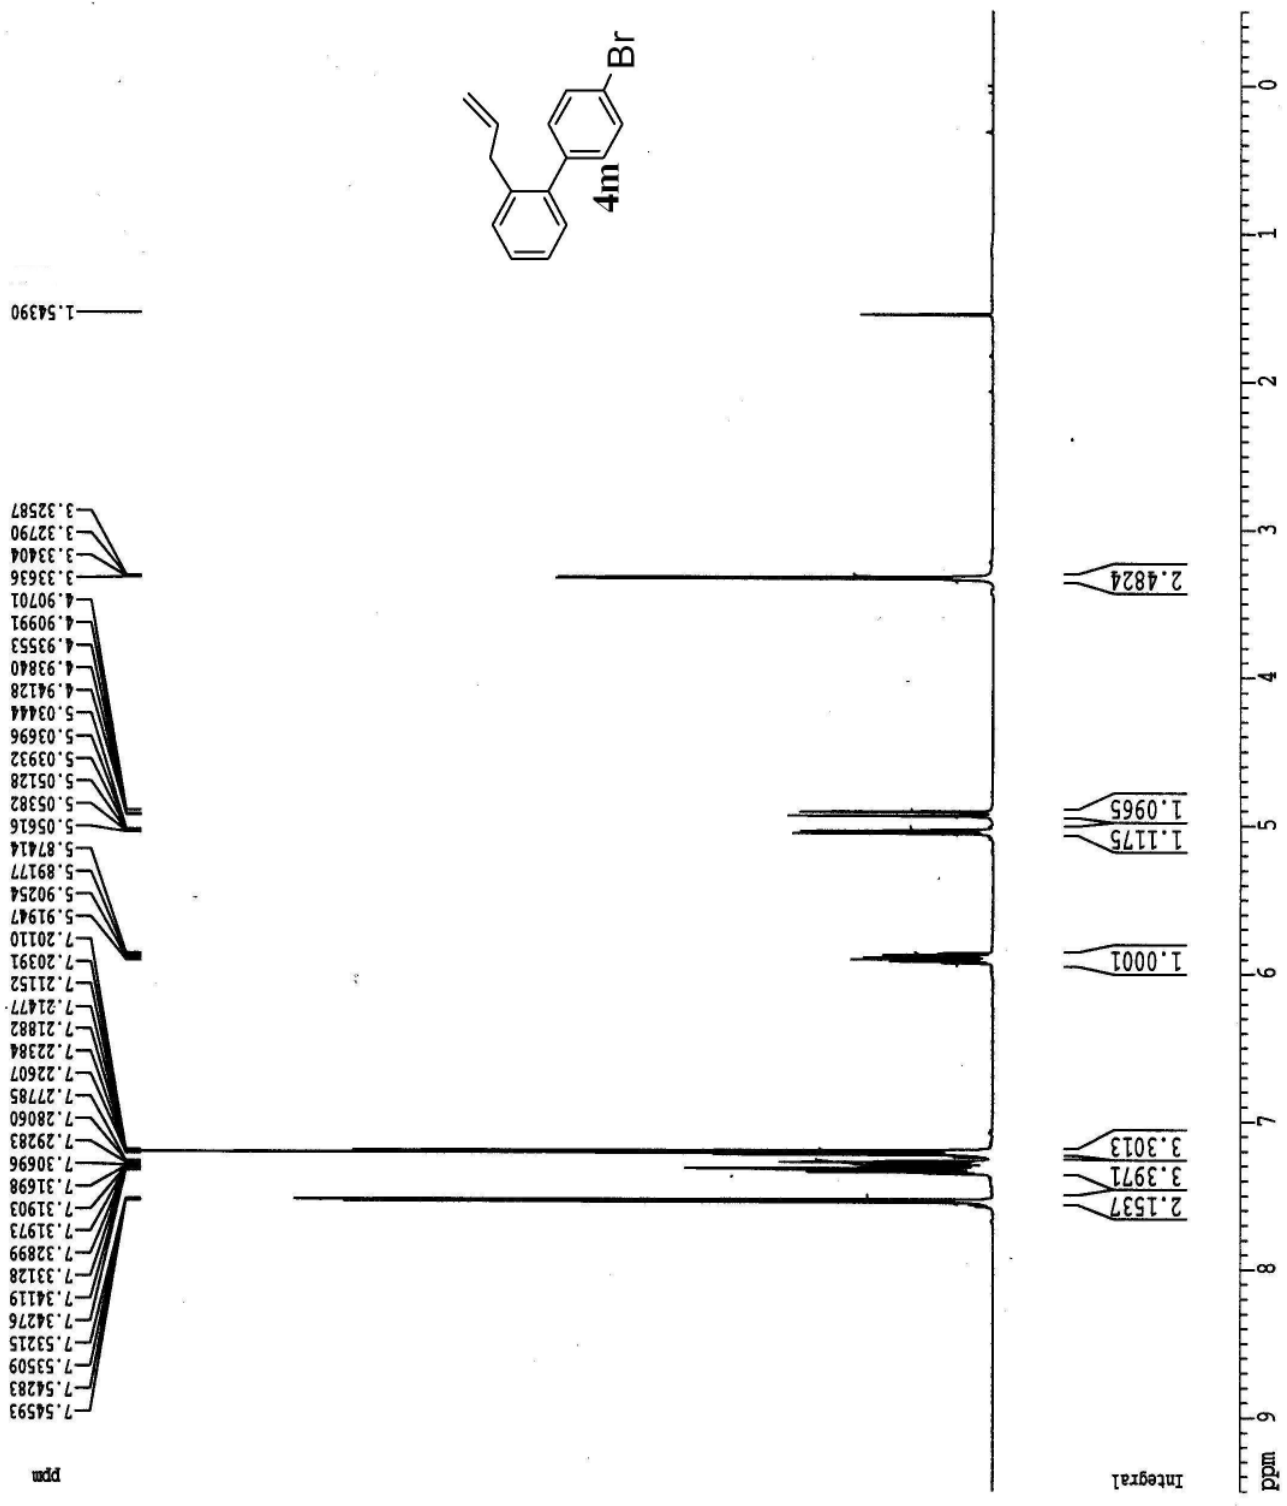

Current Data Parameters  
 AVE J2-B3A-21  
 XPRNO 1  
 ROCNO 1

2 - Acquisition Parameters  
 ate\_ 20041107  
 ime 16.14  
 INSTRUM spect  
 ROBRID 5 mm QNP 1H/1  
 VULPROG zg  
 D 32768  
 OLVENT CDCl3  
 S 16  
 S 0  
 WH 7183.908 Hz  
 IDRES 0.219235 Hz  
 Q 2.2807028 sec  
 G 16  
 W 69.600 usec  
 E 6.50 usec  
 E 296.4 K  
 I 1.00000000 sec  
 CREST 0.00000000 sec  
 CWK 0.01500000 sec

===== CHANNEL f1 =====  
 UC1 1H  
 L1 10.00 usec  
 L1 4.00 dB  
 F01 599.6029980 MHz

2 - Processing parameters  
 I 32768  
 F 599.600300 MHz  
 DW no  
 SB 0  
 B 0.00 Hz  
 B 0  
 C 0.50

D NMR plot parameters  
 X 20.00 cm  
 Y 12.00 cm  
 1P 9.500 ppm  
 1 5696.20 Hz  
 2P -0.500 ppm  
 2 -299.80 Hz  
 PMCM 0.50000 ppm/cm  
 ZCM 299.80002 Hz/cm

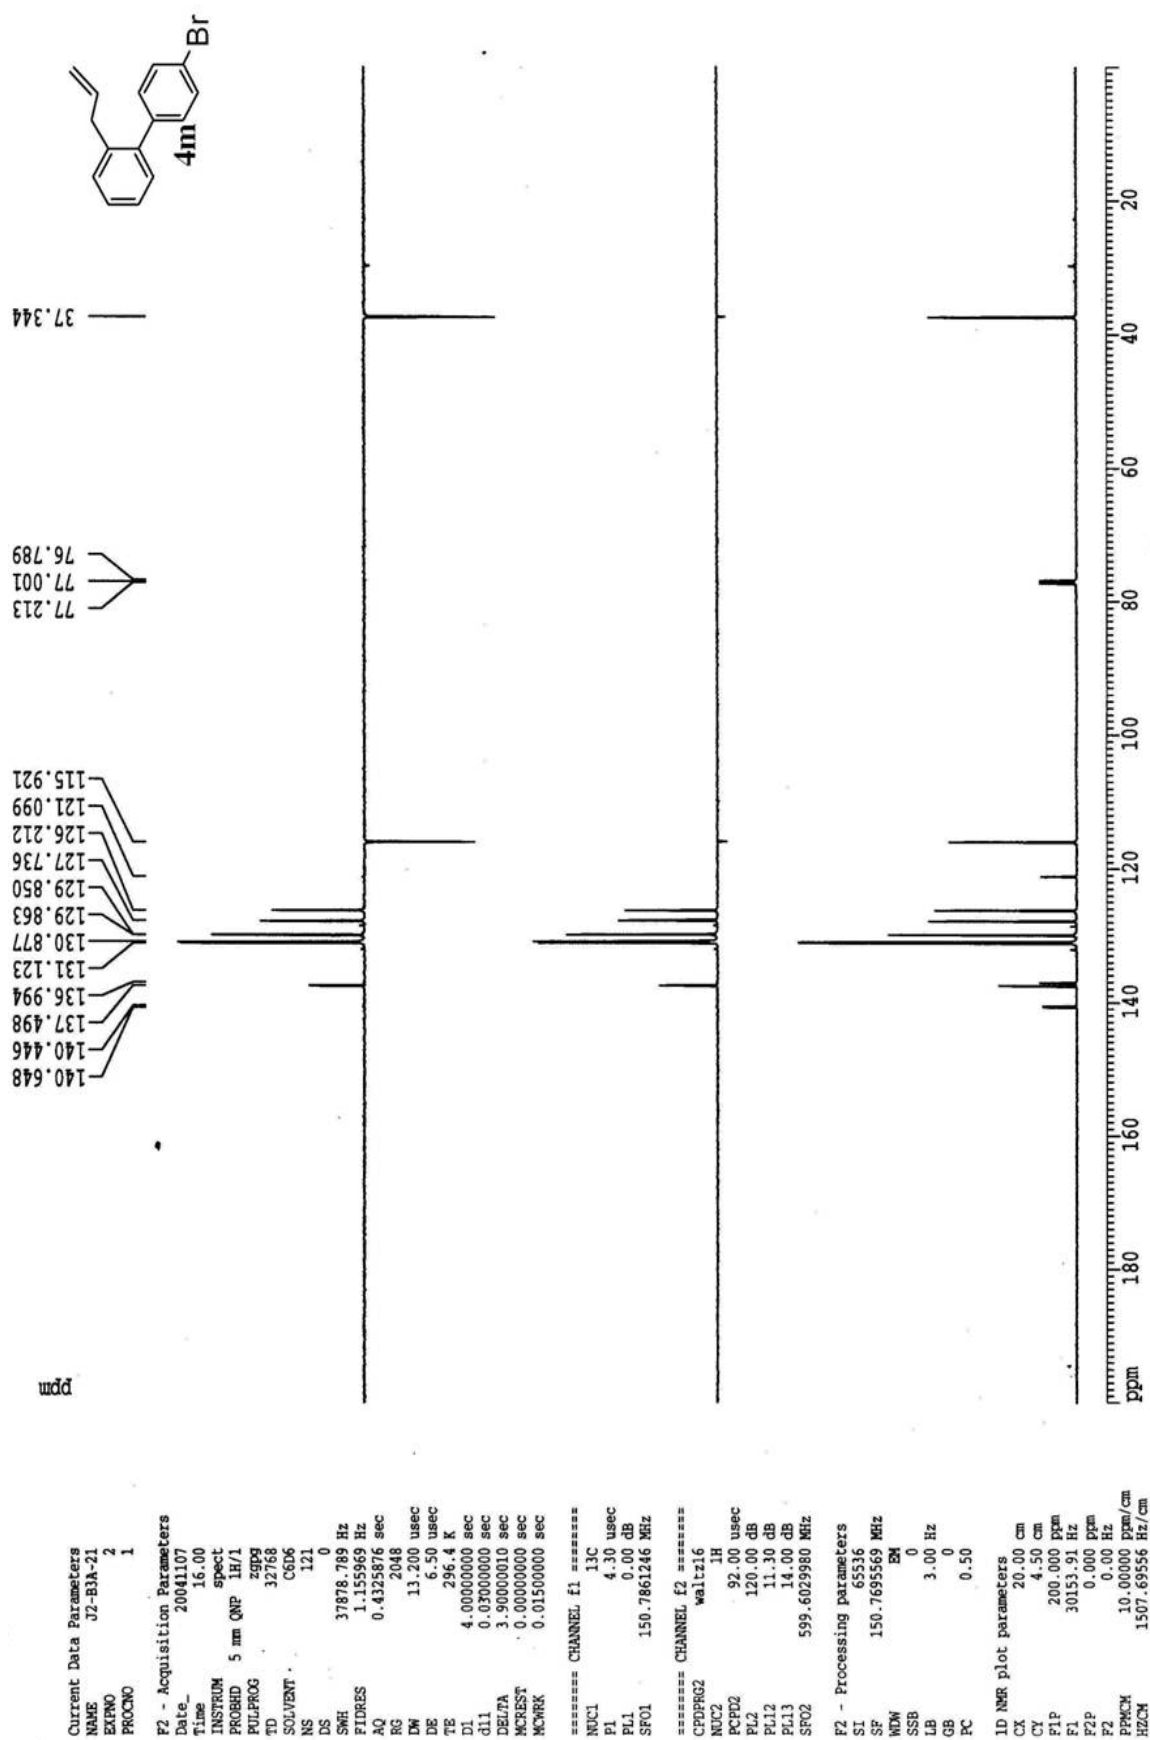

Current Data Parameters  
NAME J2-B3A-14  
EXPNO 1  
PROCNO 1

# F2 - Acquisition Parameters

Date\_ 20041109  
Time 20.27  
INSTRUM spect  
PROBHD 5 mm QNP 1H/1  
PULPROG zg  
TD 32768  
SOLVENT CDCl3  
NS 16  
DS 0  
SWH 8389.262 Hz  
FIDRES 0.256020 Hz  
AQ 1.9530228 sec  
RG 16  
DW 59.600 usec  
DE 6.50 usec  
TE 297.0 K  
DL 1.00000000 sec  
MCREST 0.00000000 sec  
MCWRK 0.01500000 sec

===== CHANNEL f1 =====  
NUC1 1H  
P1 10.00 usec  
PL1 4.00 dB  
SFO1 599.6029980 MHz

F2 - Processing parameters  
SI 32768  
SF 599.6000000 MHz  
WDW no  
SSB 0  
LB 0.00 Hz  
GB 0  
PC 0.50

1D NMR plot parameters  
CX 20.00 cm  
CY 8.00 cm  
F1P 9.500 ppm  
F1 5696.20 Hz  
F2P -0.500 ppm  
F2 -299.80 Hz  
PPMCM 0.50000 ppm/cm  
HZCM 299.79999 Hz/cm

8.26546  
8.26309  
8.26019  
8.25336  
8.25153  
7.72190  
7.71145  
7.70960  
7.70886  
7.70688  
7.63785  
7.62576  
7.62331  
7.42521  
7.41508  
7.41271  
7.39225  
7.39038  
7.35760  
7.35517  
7.29442  
7.29229  
5.95342  
5.93646  
5.92605  
5.92491  
5.90807  
5.10439  
5.10169  
5.09912  
5.09007  
5.08752  
5.08485  
4.95206  
4.94916  
4.94625  
4.92357  
4.92064  
3.7351  
3.7127  
3.6876  
3.6324  
3.36088  
3.35840

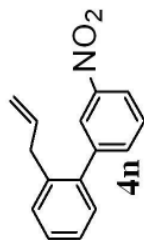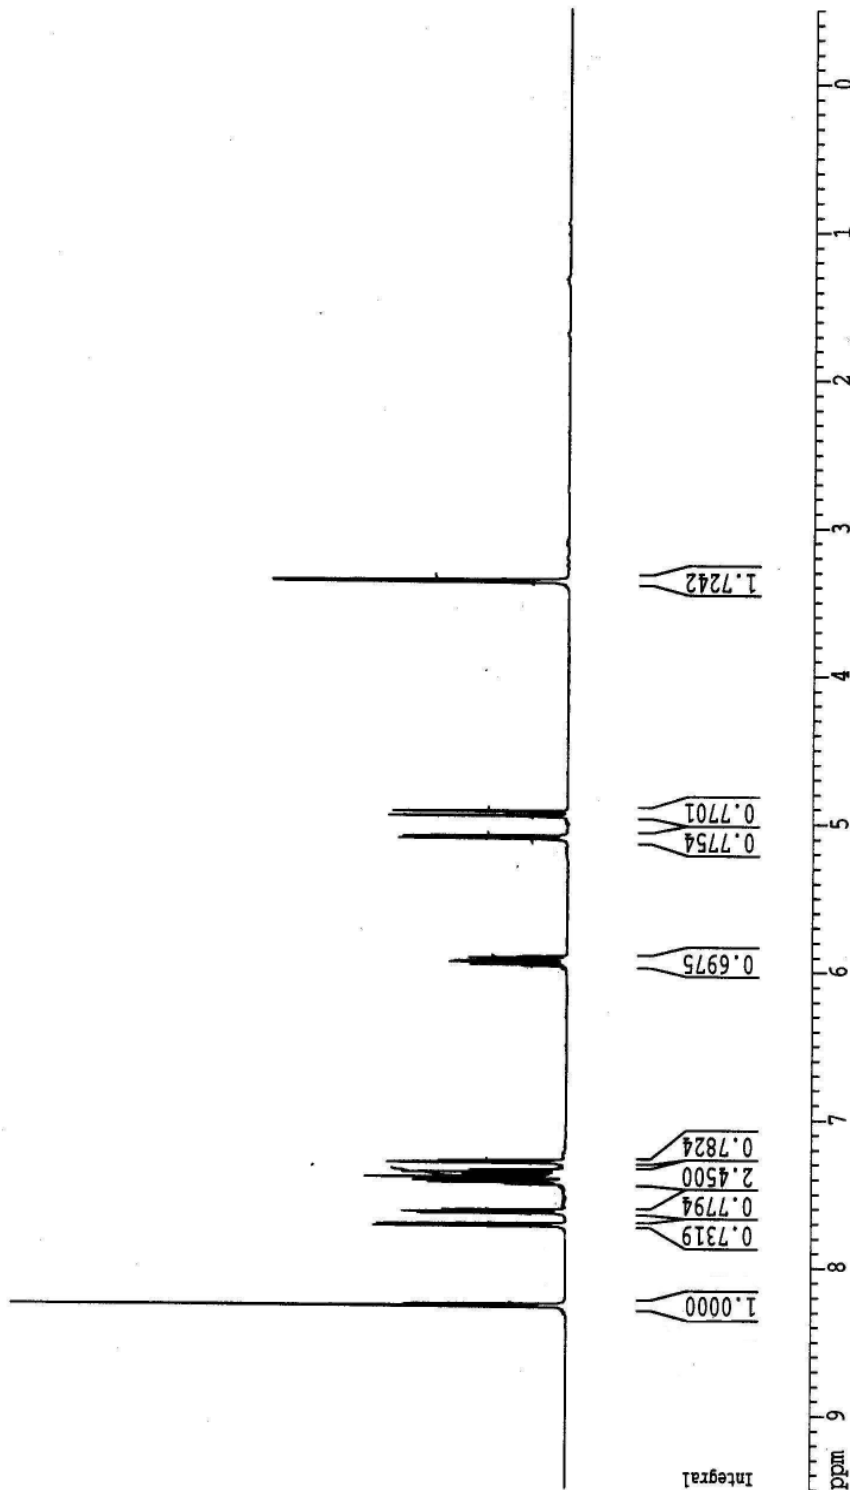



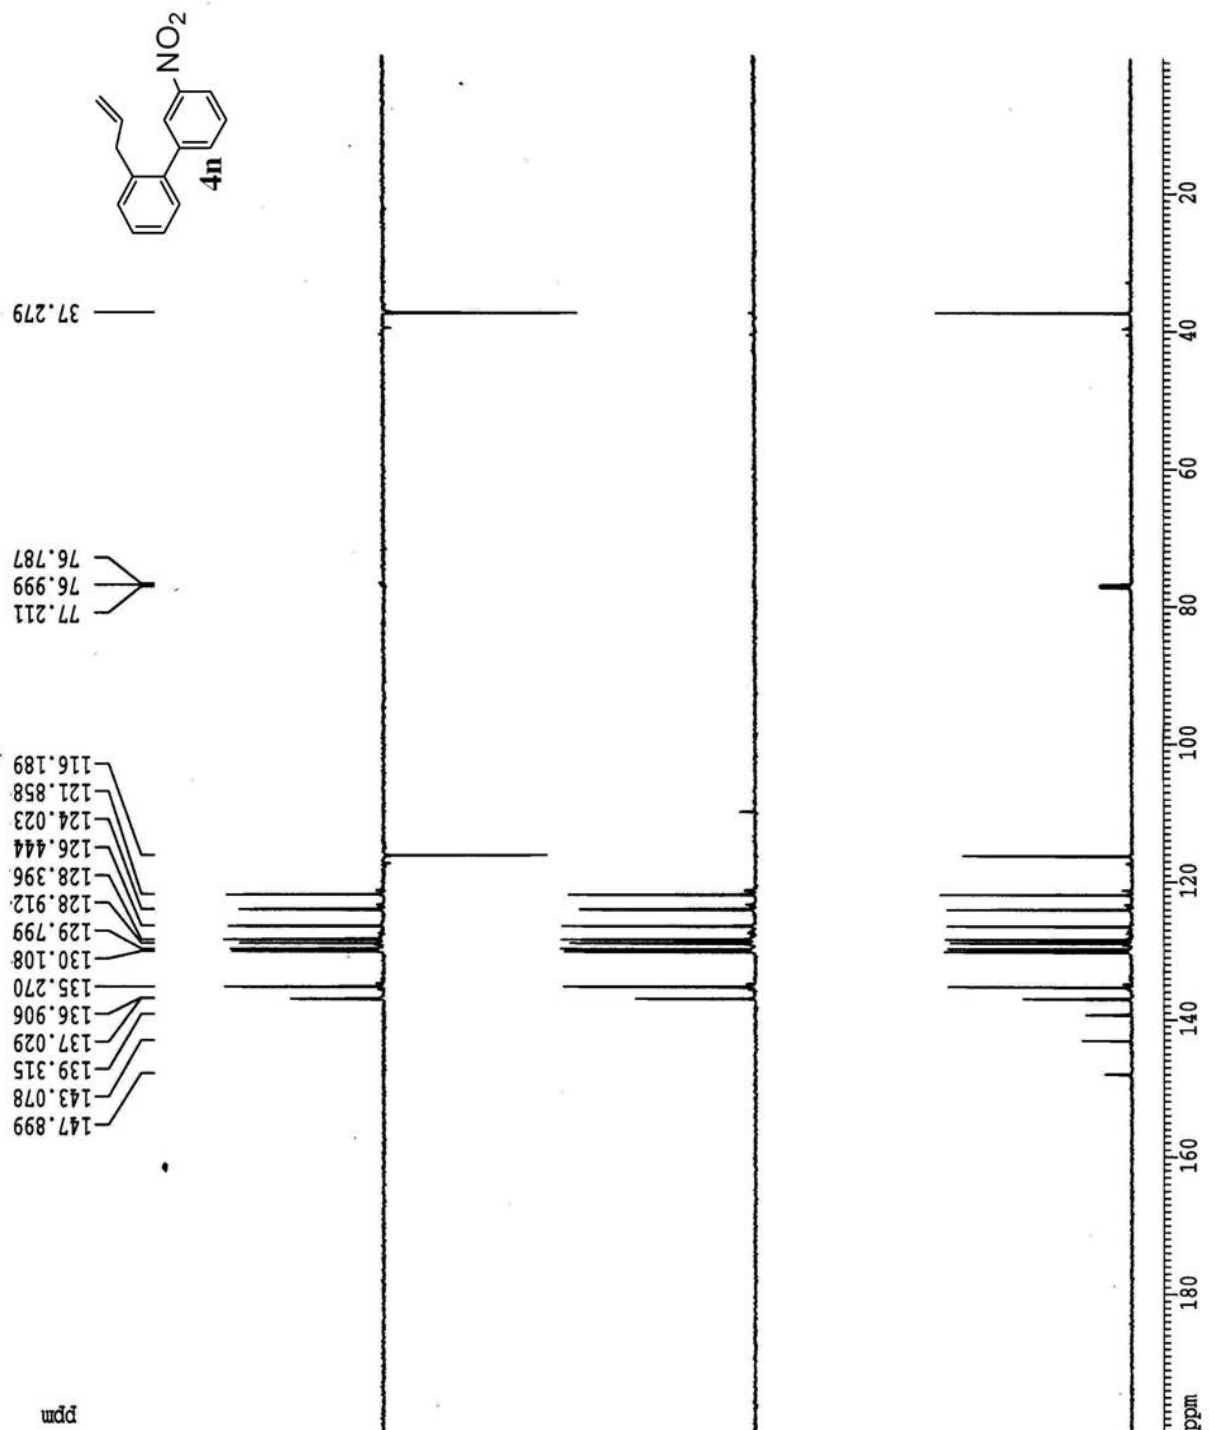

Current Data Parameters

|        |           |
|--------|-----------|
| NAME   | J2-B3A-14 |
| EXPNO  | 2         |
| PROCNO | 1         |

F2 - Acquisition Parameters

|         |                |
|---------|----------------|
| Date_   | 20041109       |
| Time    | 20.22          |
| INSTRUM | spect          |
| PROBHD  | 5 mm QNP 1H/1  |
| PULPROG | zgpg3          |
| TD      | 32768          |
| SOLVENT | C6D6           |
| NS      | 16             |
| DS      | 0              |
| SWH     | 33003.301 Hz   |
| FIDRES  | 1.007181 Hz    |
| AQ      | 0.4964852 sec  |
| RG      | 2048           |
| DW      | 15.150 usec    |
| DE      | 6.50 usec      |
| TE      | 297.1 K        |
| DI      | 4.00000000 sec |
| GL1     | 0.03000000 sec |
| DELTA   | 3.90000010 sec |
| MCREST  | 0.00000000 sec |
| MCWRSK  | 0.01500000 sec |

===== CHANNEL f1 =====

|      |                 |
|------|-----------------|
| NUC1 | 13C             |
| PL   | 4.30 usec       |
| PL1  | 0.00 dB         |
| SFO1 | 150.7861246 MHz |

===== CHANNEL f2 =====

|         |                 |
|---------|-----------------|
| CPDPRG2 | waltz16         |
| NUC2    | 1H              |
| PCPD2   | 92.00 usec      |
| PL2     | 120.00 dB       |
| PL12    | 11.30 dB        |
| PL13    | 14.00 dB        |
| SFO2    | 599.6029980 MHz |

F2 - Processing parameters

|     |                 |
|-----|-----------------|
| SI  | 65536           |
| SF  | 150.7695651 MHz |
| WDW | EM              |
| SSB | 0               |
| LB  | 3.00 Hz         |
| GB  | 0               |
| PC  | 0.50            |

1D NMR plot parameters

|       |                  |
|-------|------------------|
| CX    | 20.00 cm         |
| CY    | 3.00 cm          |
| FLP   | 200.000 ppm      |
| F1    | 30153.91 Hz      |
| F2    | 0.000 ppm        |
| F2    | 0.00 Hz          |
| PPMCM | 10.00000 ppm/cm  |
| HZCM  | 1507.69556 Hz/cm |

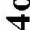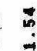

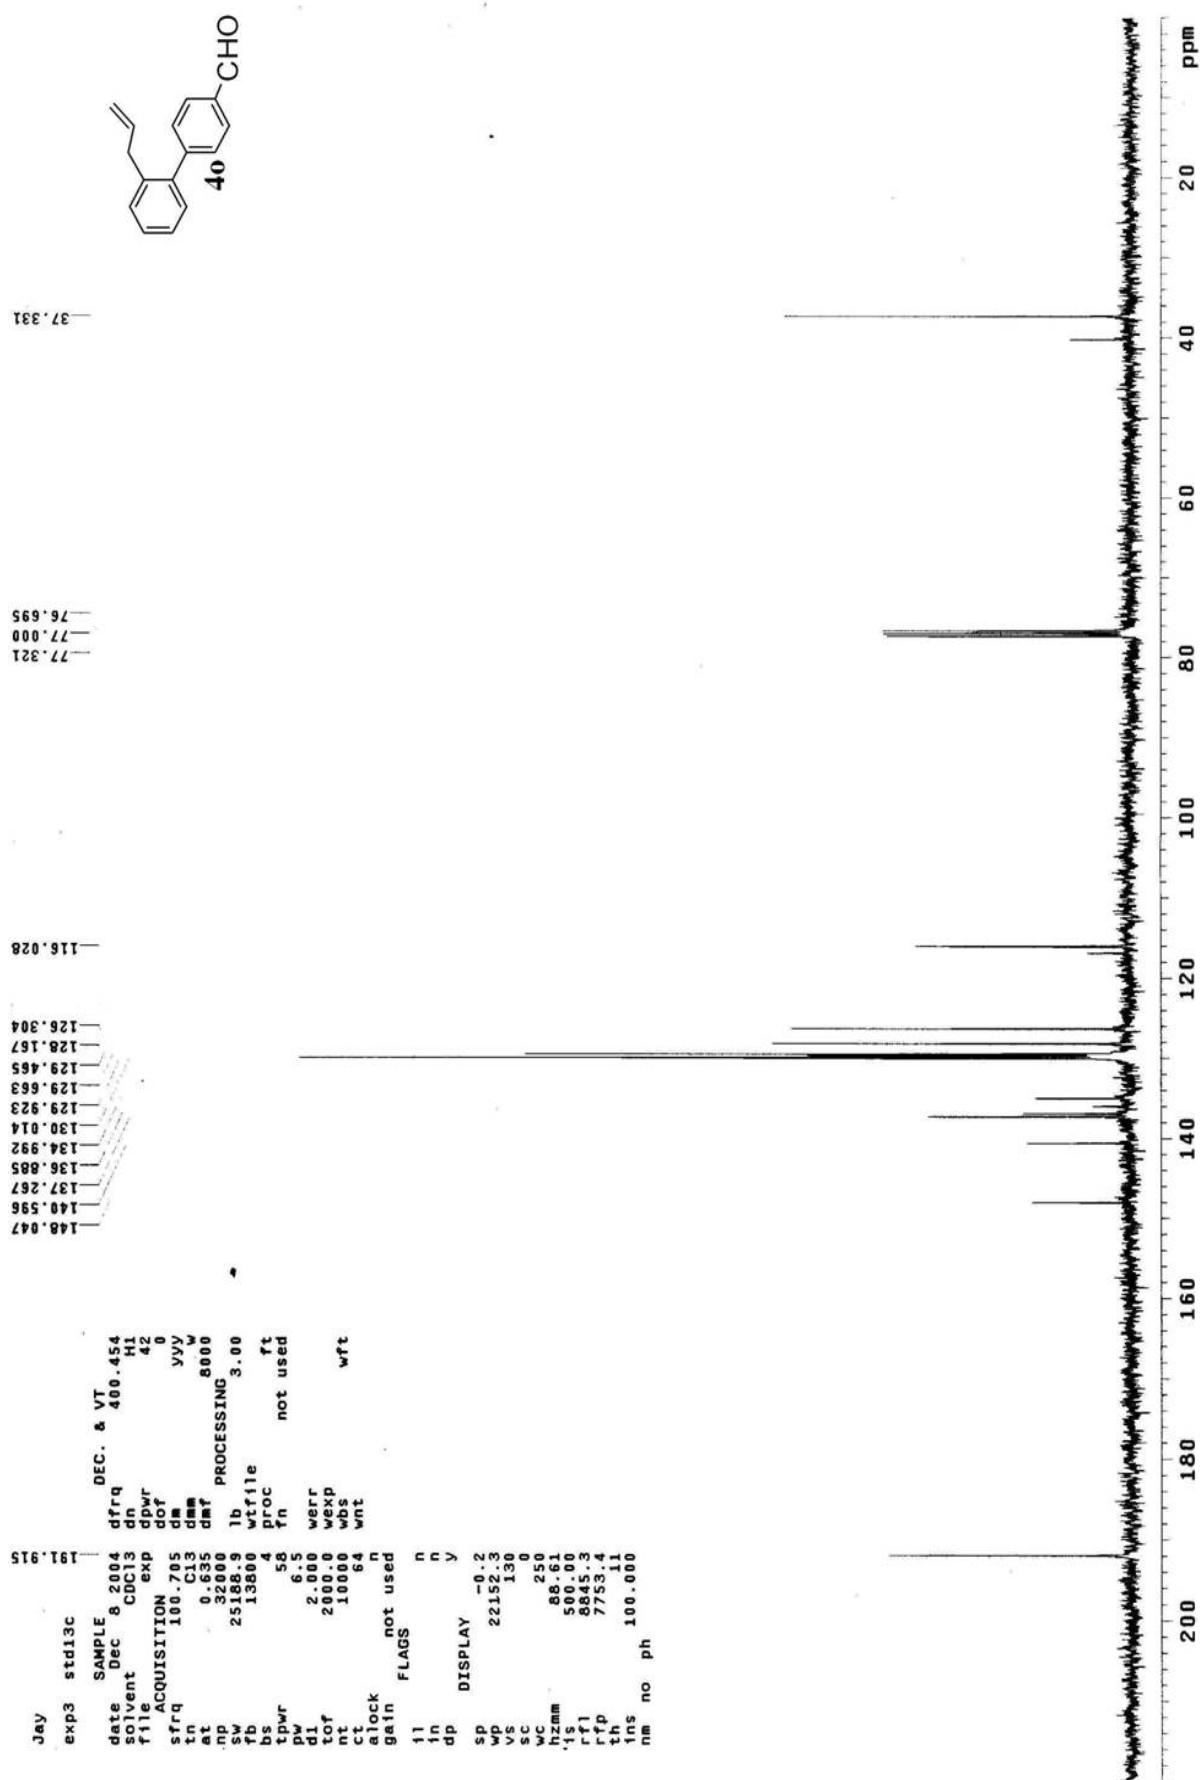

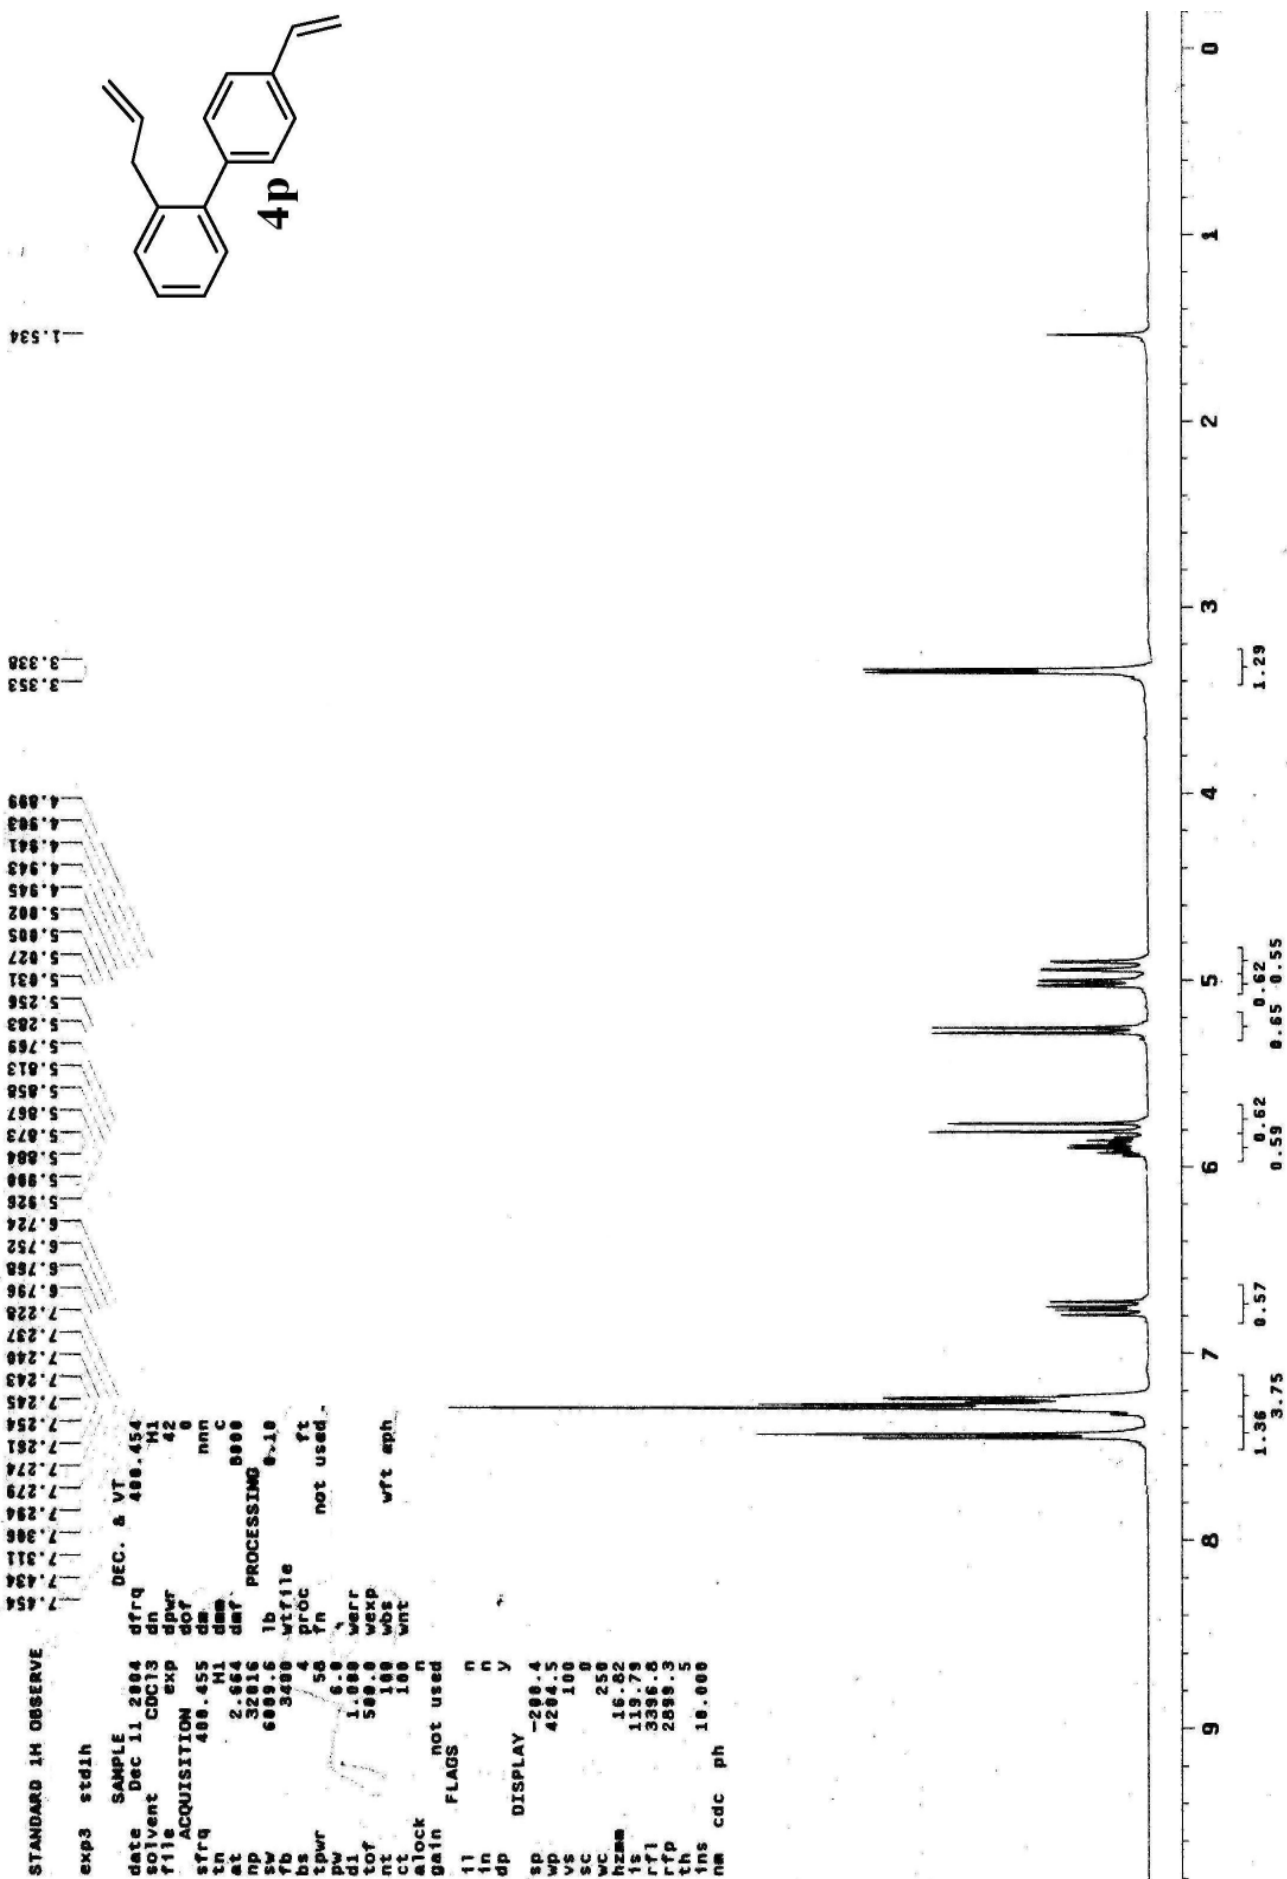

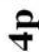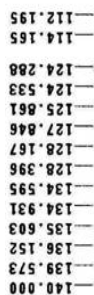

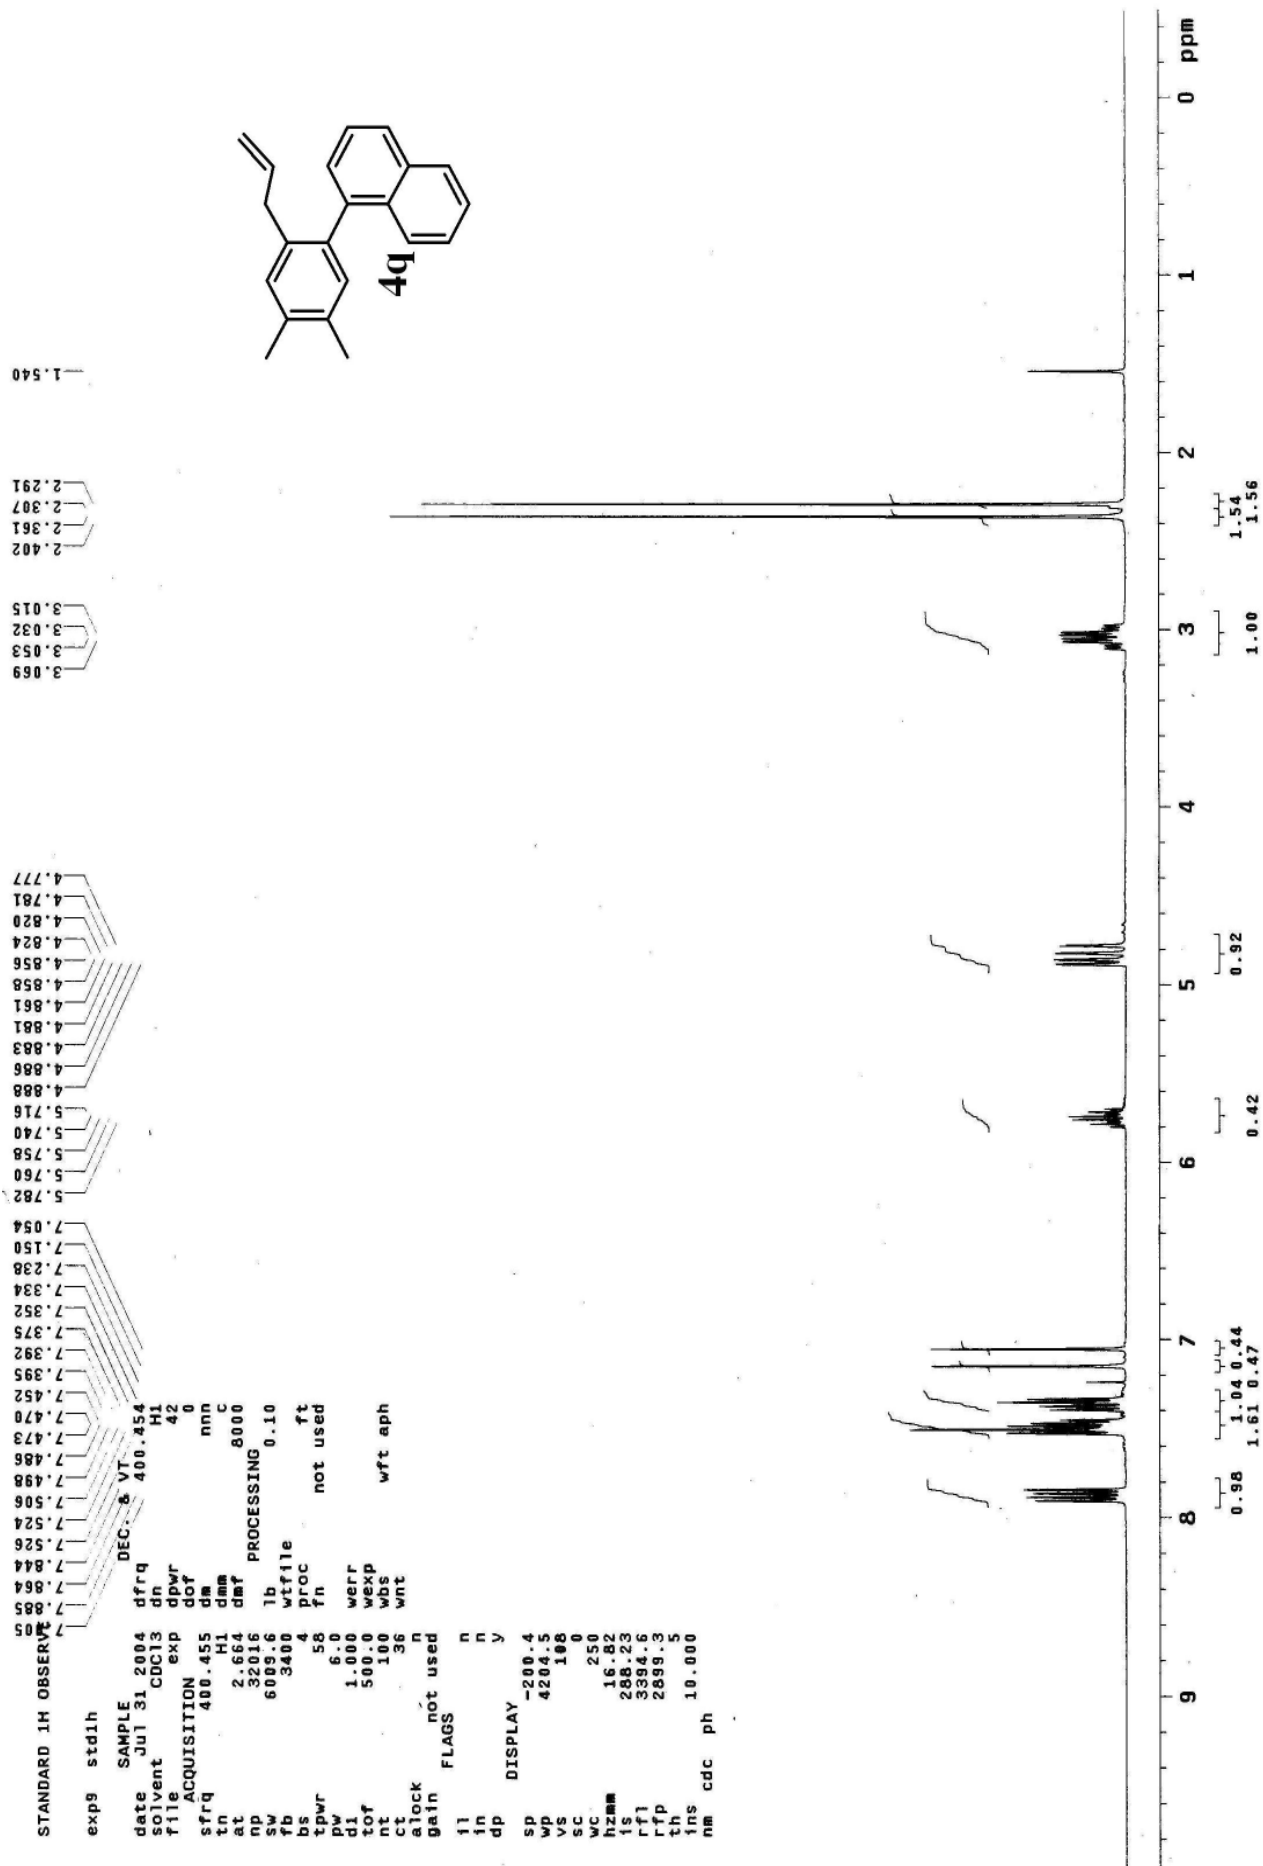

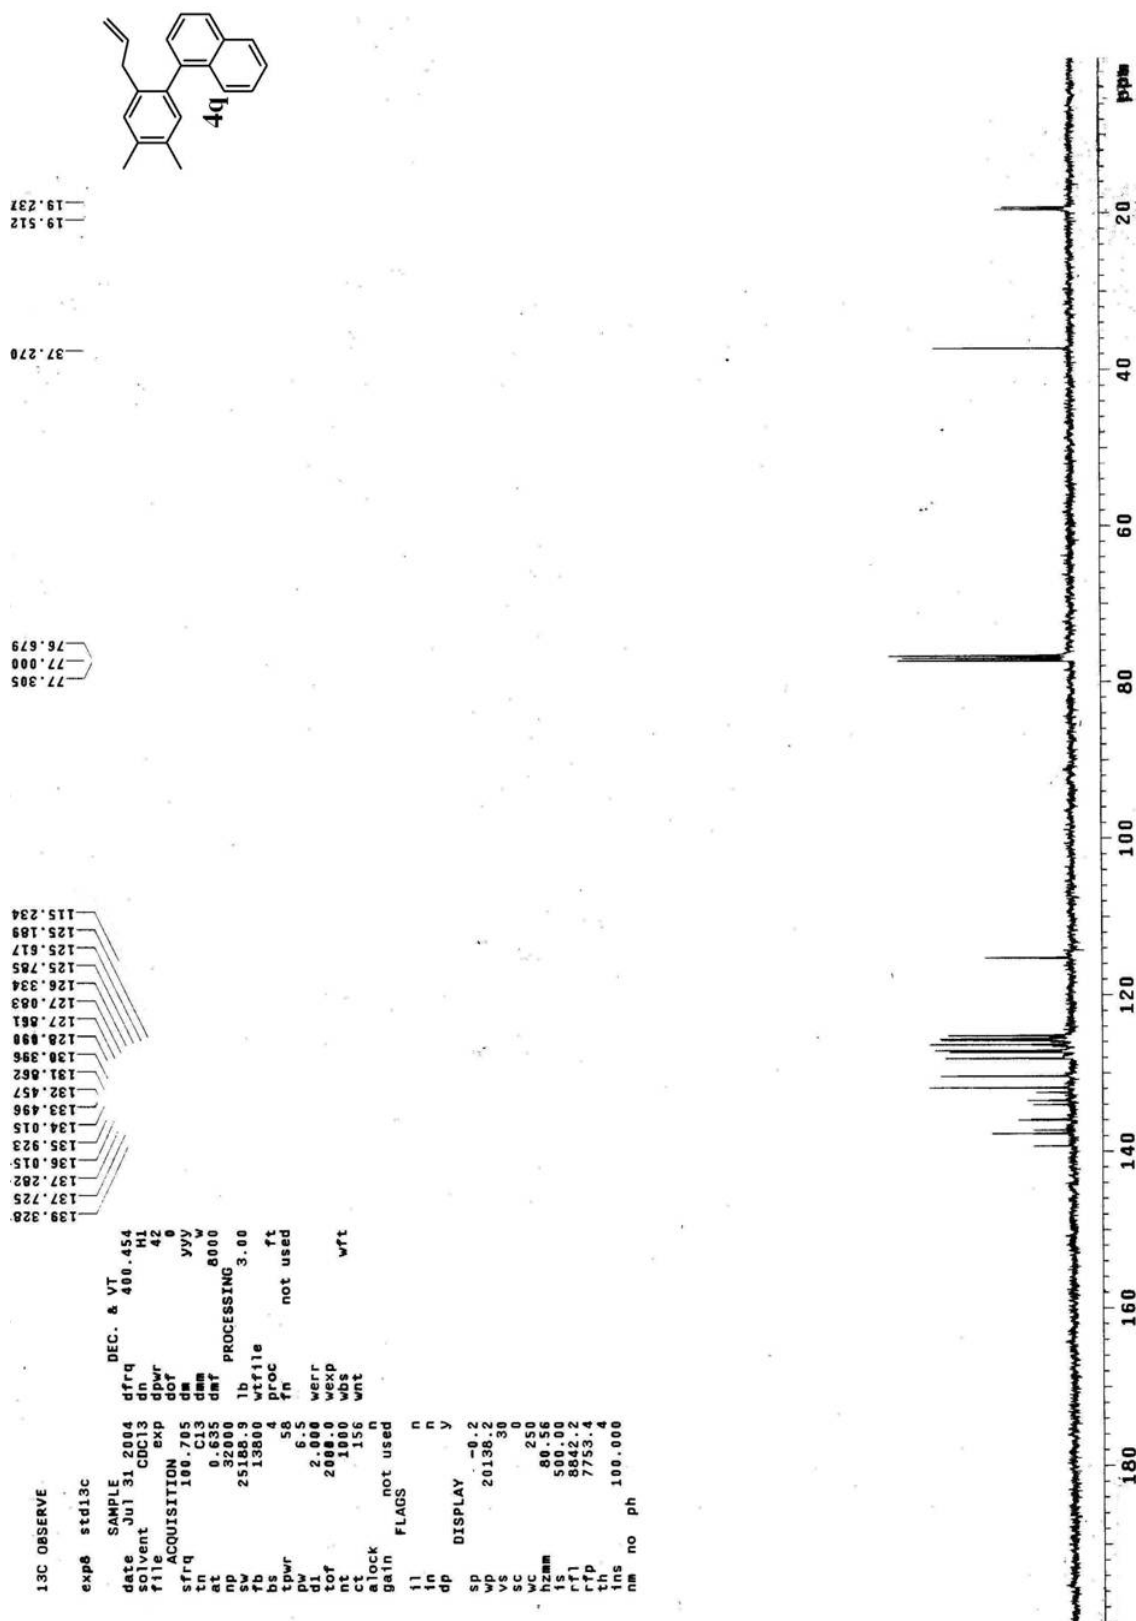

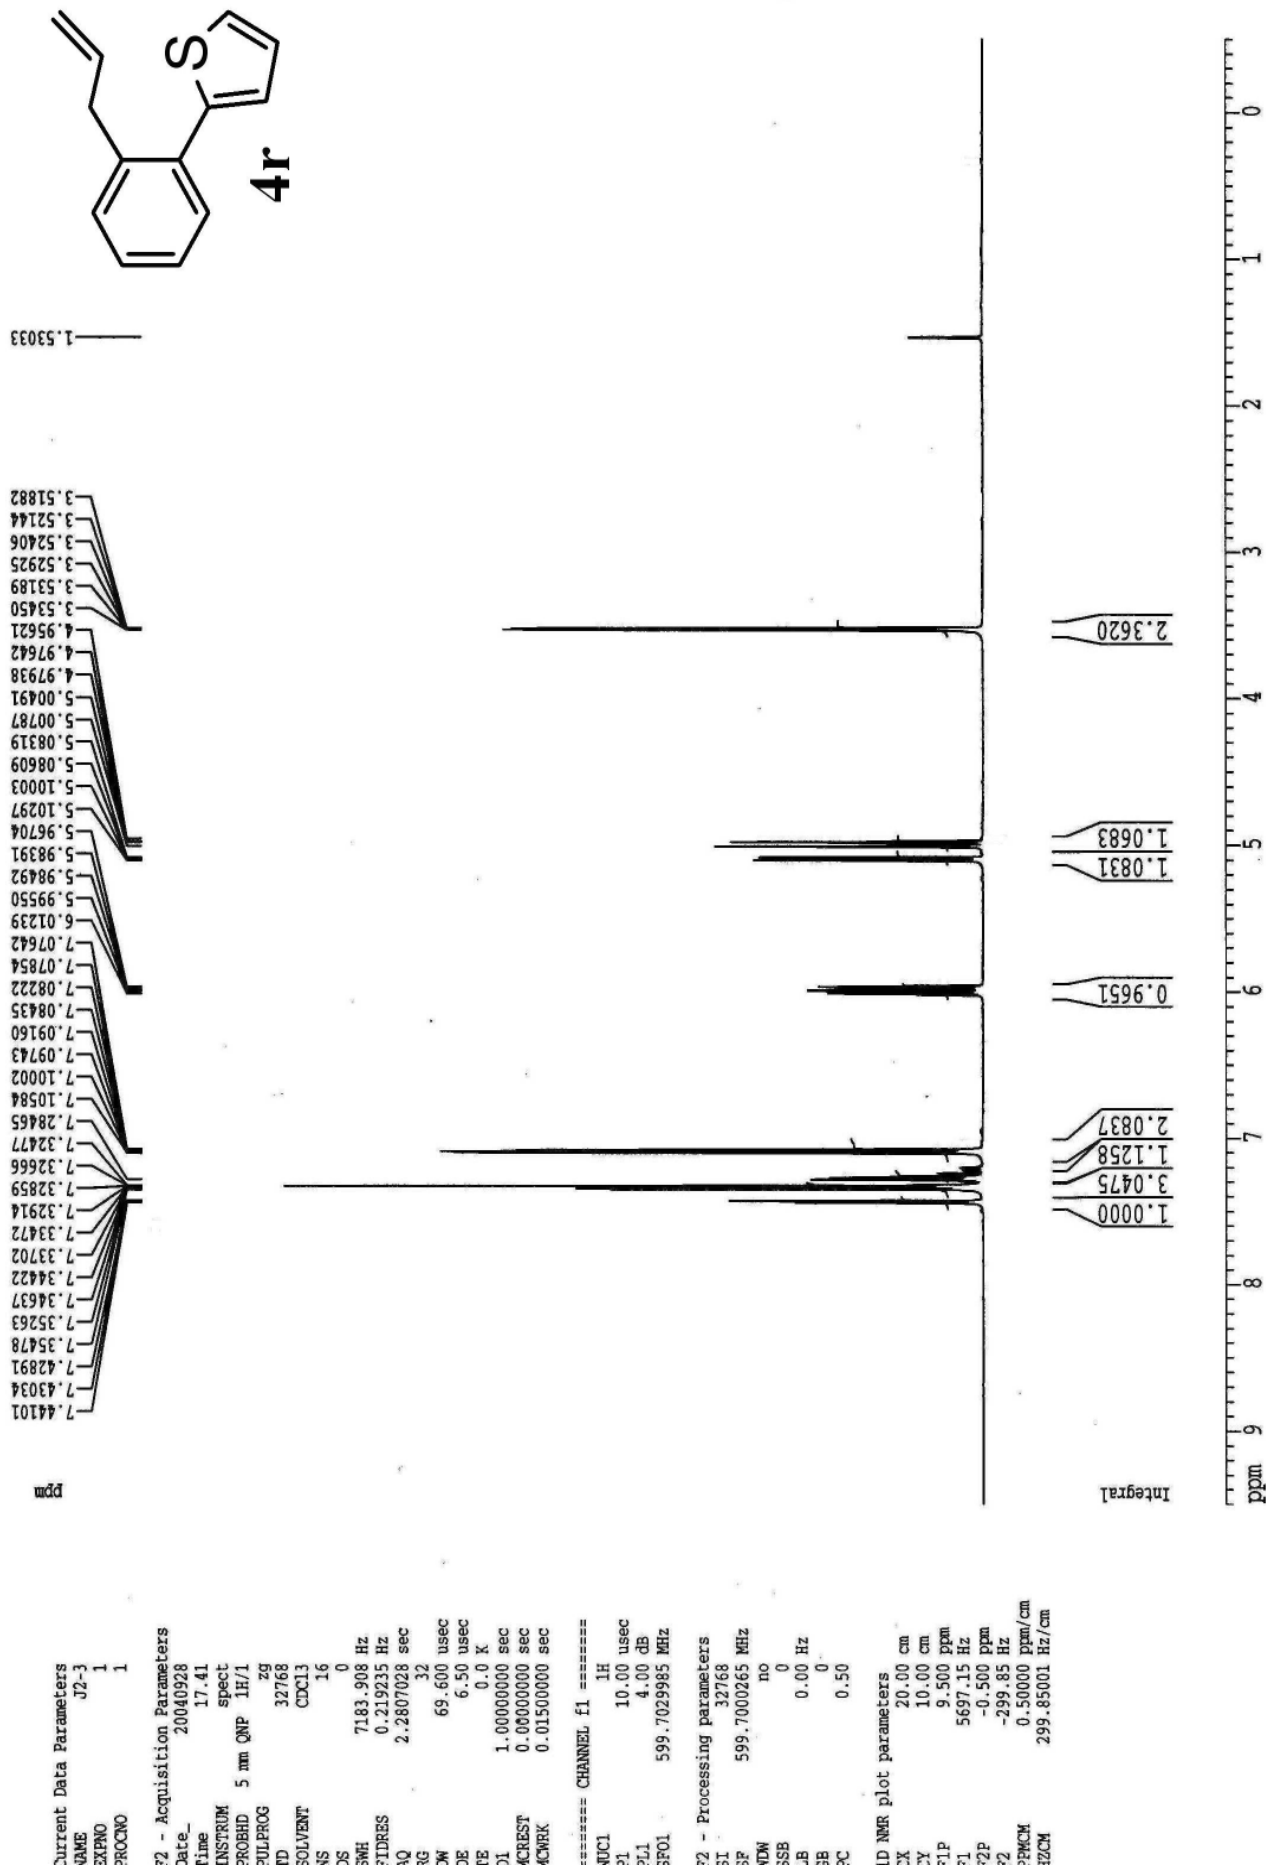



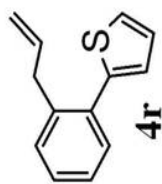

37.693

76.787  
76.999  
77.211

115.939  
125.243  
126.161  
126.496  
126.986  
128.030  
130.026  
131.015  
134.113  
137.564  
138.121  
142.542

ppm

Current Data Parameters  
NAME J2-3  
EXPNO 2  
PROCNO 1

F2 - Acquisition Parameters

Date\_ 20040928  
Time 17.57  
INSTRUM spect  
PROBHD 5 mm QNP 1H/1  
PULPROG zgpg30  
TD 32768  
SOLVENT C6D6  
NS 200  
DS 0  
SWH 37878.789 Hz  
FIDRES 1.155969 Hz  
AQ 0.4325876 sec  
RG 2048  
DM 13.200 usec  
DE 6.50 usec  
TE 300 K  
D1 4.00000000 sec  
d11 0.03000000 sec  
DELTA 3.90000010 sec  
MCKEST 0.00000000 sec  
MCWK 0.01500000 sec

===== CHANNEL f1 =====  
NUC1 13C  
P1 4.50 usec  
PL1 0.00 dB  
SFO1 150.811274 MHz

===== CHANNEL f2 =====  
CPDPRG2 waltz16  
NUC2 1H  
PCPD2 92.00 usec  
PL2 120.00 dB  
PL12 8.80 dB  
PL13 10.00 dB  
SFO2 599.702985 MHz

F2 - Processing parameters  
SI 65536  
SF 150.7947004 MHz  
WDW EM  
SSB 0  
LB 3.00 Hz  
GB 0  
PC 0.50

1D NMR plot parameters  
CX 20.00 cm  
CY 4.00 cm  
F1P 200.000 ppm  
F1 30158.94 Hz  
F2P 0.000 ppm  
F2 0.00 Hz  
PPMCK 10.00000 ppm/cm  
HZCM 1507.94690 Hz/cm

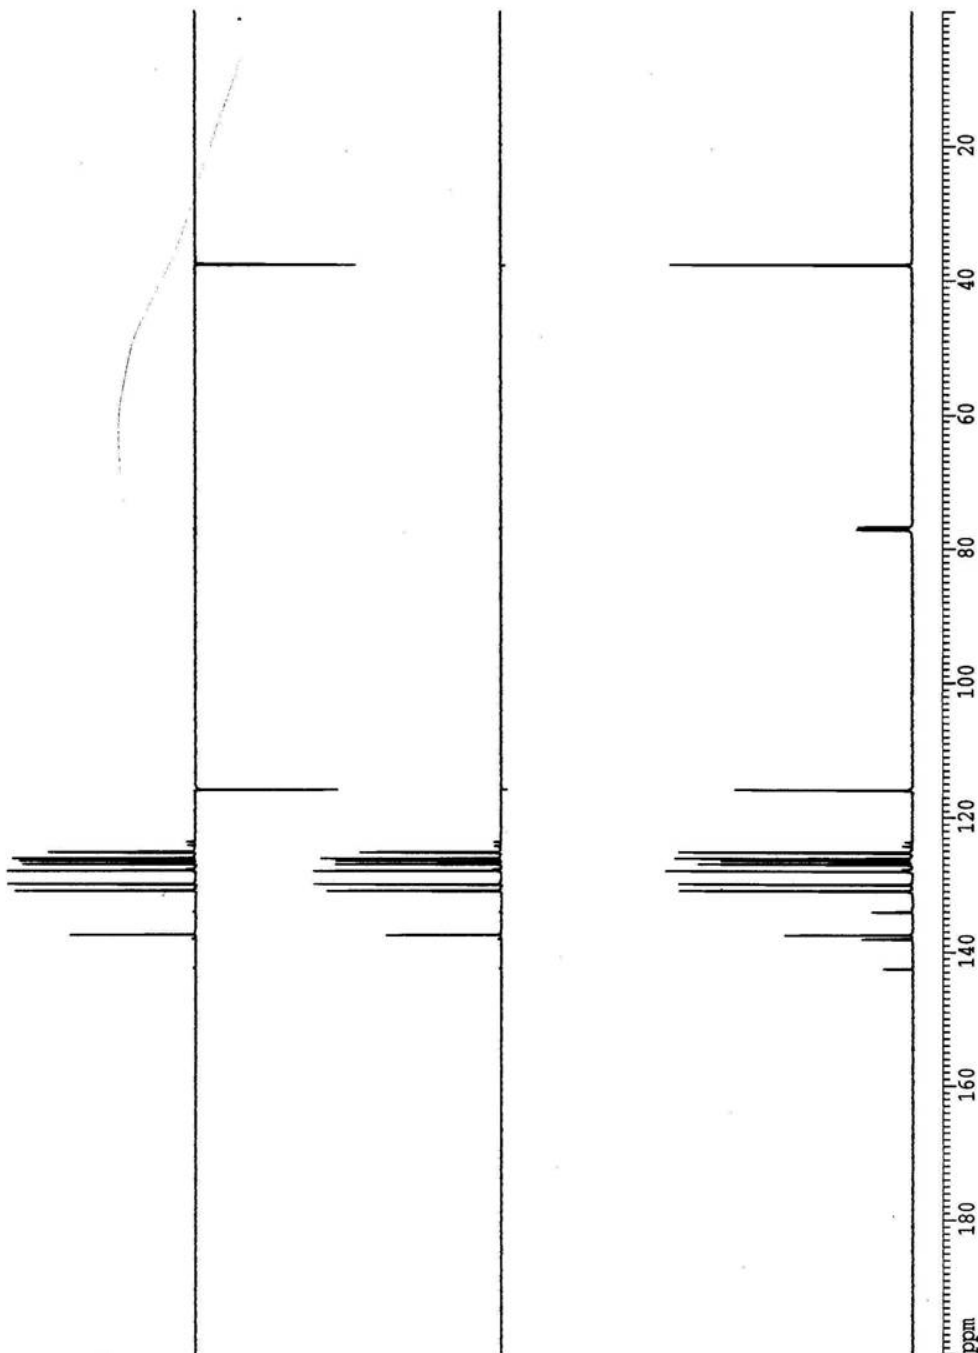

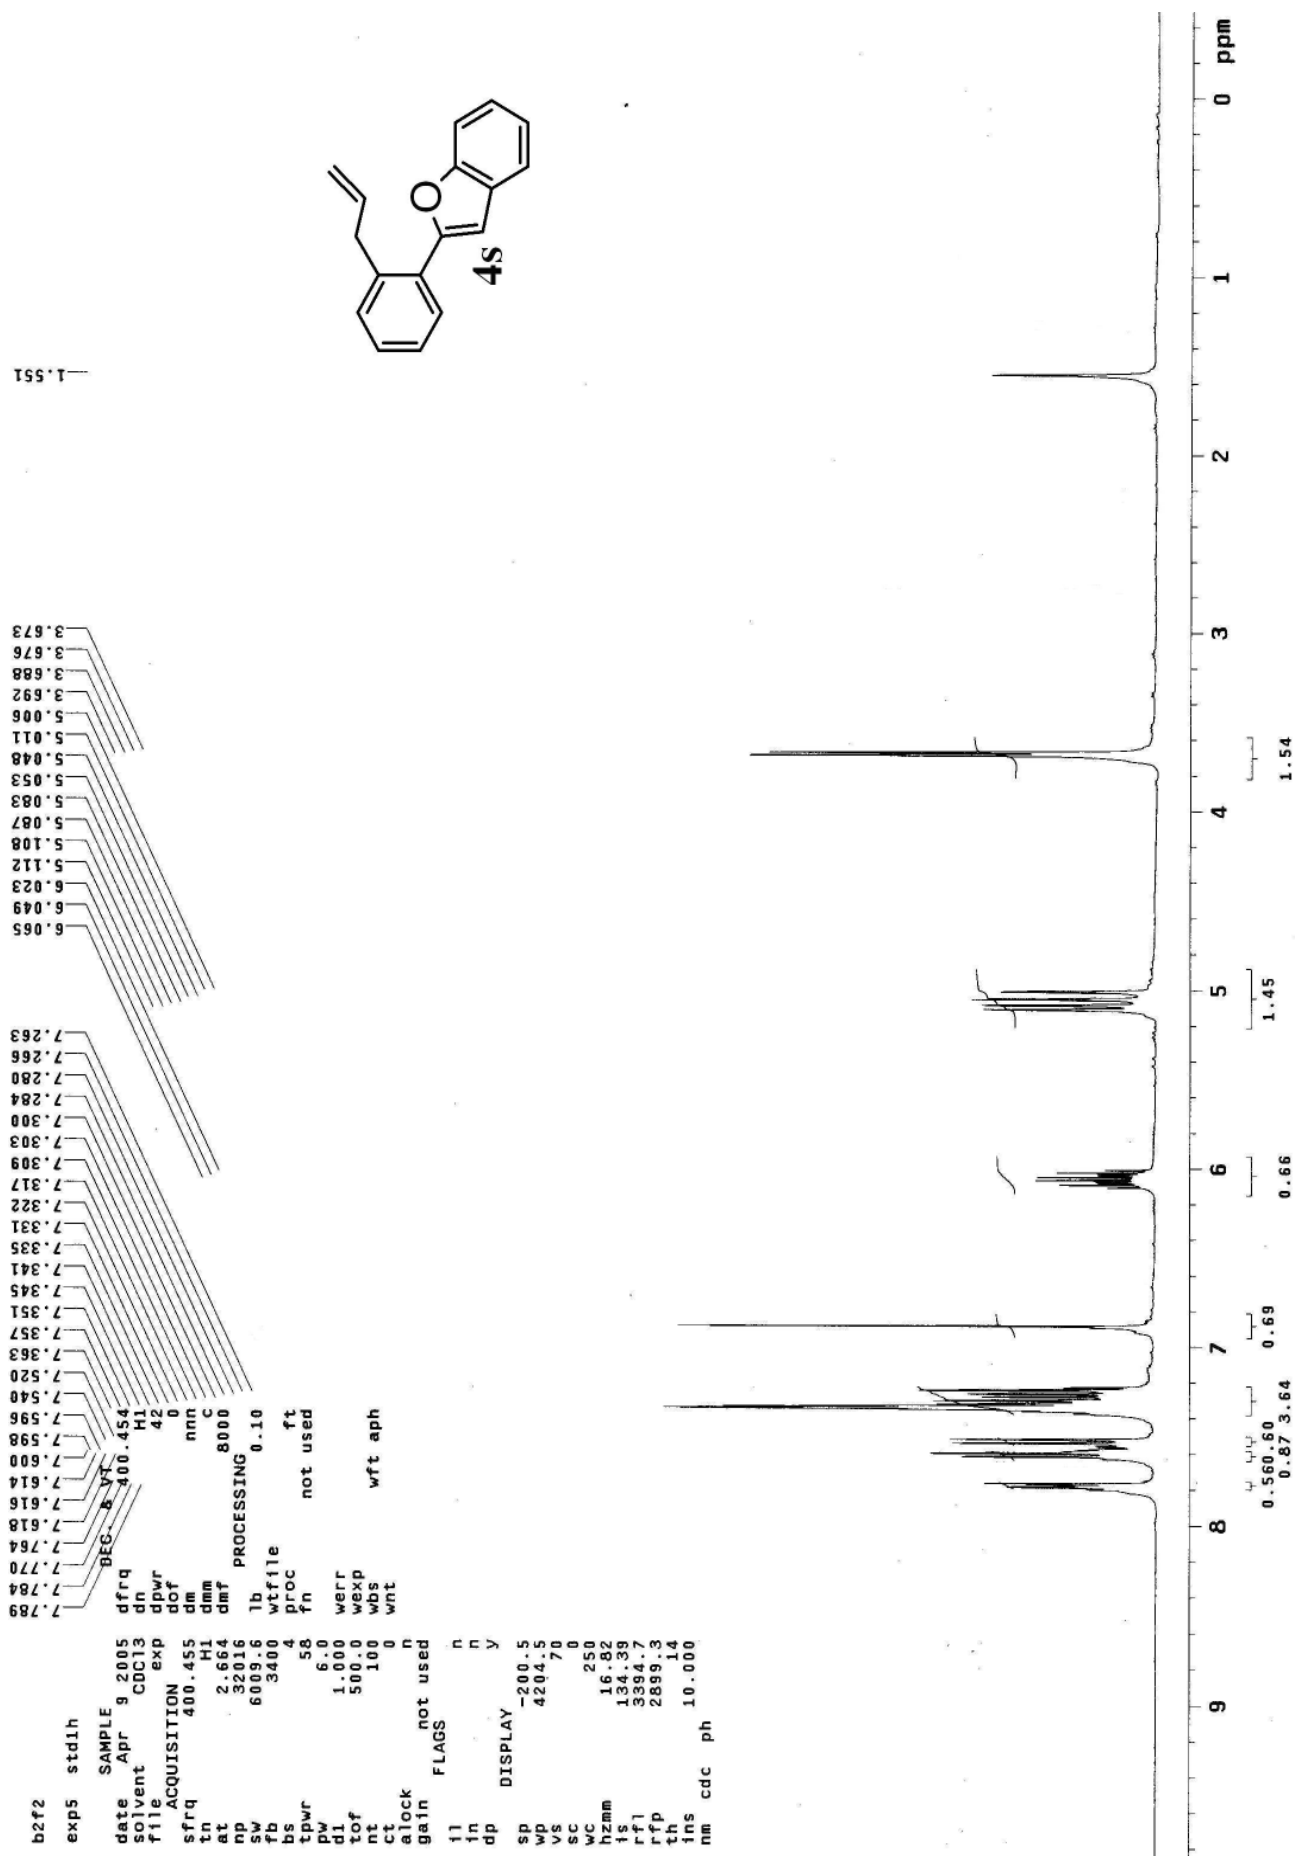

Supplement: Supplementary file 1 [file 5116273]
